# Supplementary material for: Emissions of non-methane volatile organic compounds from combustion of domestic fuels in Delhi, India
Source: Copernicus journal article supplement (doi:10.5194/acp-2020-892), 2020-10-19
Supplement: Supplementary file 1 [file acp-2020-892-supplement.zip]

**Supplement to “Emissions of non-methane volatile organic compounds from combustion of domestic fuels in Delhi, India”**

Gareth J. Stewart<sup>1</sup>, W. Joe F. Acton<sup>2,a</sup>, Beth S. Nelson<sup>1</sup>, Adam R. Vaughan<sup>1</sup>, James R. Hopkins<sup>1,3</sup>, Rahul Arya<sup>4,5</sup>, Arnab Mondal<sup>4,5</sup>, Ritu Jangirh<sup>4,5</sup>, Sakshi Ahlawat<sup>4,5</sup>, Lokesh Yadav<sup>4,5</sup>, Sudhir K. Sharma<sup>4,5</sup>, Rachel E. Dunmore<sup>1</sup>, Siti S. M. Yunus<sup>6</sup>, C. Nicholas Hewitt<sup>2</sup>, Eiko Nemitz<sup>7</sup>, Neil Mullinger<sup>7</sup>, Ranu Gadi<sup>8</sup>, Lokesh. K. Sahu<sup>9</sup>, Nidhi Tripathi<sup>9</sup>, Andrew R. Rickard<sup>1,3</sup>, James D Lee<sup>1,3</sup>, Tuhin K. Mandal<sup>4,5</sup> and Jacqueline F. Hamilton<sup>1</sup>.

<sup>1</sup> Wolfson Atmospheric Chemistry Laboratories, Department of Chemistry, University of York, York, YO10 5DD, UK

<sup>2</sup> Lancaster Environment Centre, Lancaster University, Lancaster LA1 4YQ, UK

<sup>3</sup> National Centre for Atmospheric Science, University of York, York, YO10 5DD, UK

<sup>4</sup> CSIR-National Physical Laboratory, Dr. K.S. Krishnan Marg, New Delhi, Delhi 110012, India

<sup>5</sup> Academy of Scientific & Innovative Research, Ghaziabad, Uttar Pradesh- 201 002, India

<sup>6</sup> School of Water, Environment and Energy, Cranfield University, Cranfield, MK43 0AL, UK

<sup>7</sup> UK Centre for Ecology and Hydrology, Penicuik, EH26 0QB, UK

<sup>8</sup> Indira Gandhi Delhi Technical University for Women, Kashmiri Gate, New Delhi, Delhi 110006, India

<sup>9</sup> Physical Research Laboratory (PRL), Ahmedabad 380009, India

<sup>a</sup> Now at: School of Geography, Earth and Environmental Sciences, University of Birmingham, B15 2TT, Birmingham, UK

20 **S1 - Breakthrough test**

21

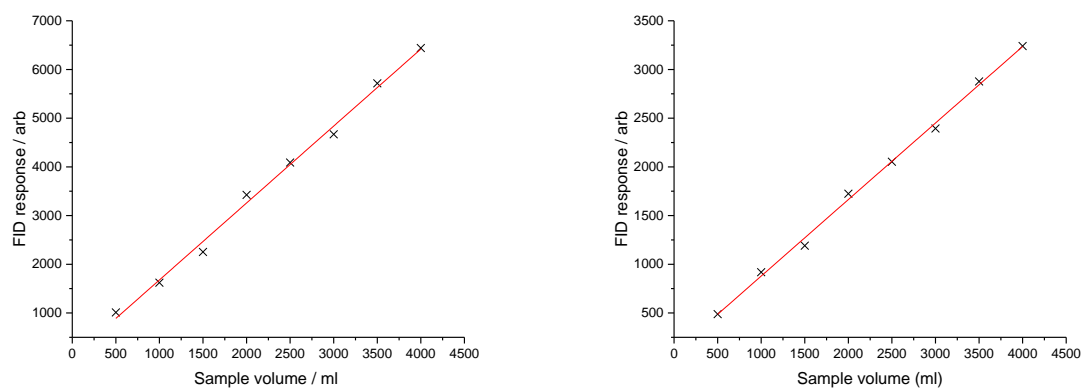

22 Figure S1. Results of the GCxGC-FID breakthrough test. Left: Benzene. Right: *n*-octane.

23

24    **S2 – Emission factors**

25    Please see the attached excel file for the emission factors measured in this study.

26

### S3 – Calculation of total volume of air sampled

NMVOC mass in  $\mu\text{g m}^{-3}$  was determined from:

$$\text{NMVOC}_{\text{mass}} = \frac{\text{NMVOC}_{\text{ppbv}} \times 12.187 \times \text{MW}}{273.15 + T}$$

where  $\text{NMVOC}_{\text{mass}}$  = NMVOC concentration in  $\mu\text{g m}^{-3}$ ,  $\text{NMVOC}_{\text{ppbv}}$  = NMVOC concentration in ppbv, MW = molecular mass in  $\text{g mol}^{-1}$  and  $T$  = temperature in  $^{\circ}\text{C}$  which was measured for each experiment.

The total volume of air convectively moving up the stack was determined from:

$$V_d = \sqrt{\frac{2gP_s}{D_s}}$$

where  $V_d$  = vertical displacement up the flue ( $\text{ms}^{-1}$ ),  $g = 9.81 \text{ m}^{-2}$ ,  $P_s$  = average stack pressure ( $\text{mmH}_2\text{O}$ ) and  $D_s$  is determined by:

$$D_s = \frac{TD_a}{T_s}$$

where  $T$  = ambient temperature (k),  $D_a$  = density of air ( $1.1455 \text{ kg m}^{-3}$ ),  $T_s$  = average stack temperature ( $^{\circ}\text{K}$ ). The emission factor (EF) was calculated by:

$$\text{EF} = \frac{tCV_dA_d}{M}$$

where  $t$  = time burned (s),  $C$  = concentration ( $\text{g m}^{-3}$ ),  $A_d$  = area of flue,  $M$  = mass of fuel burnt (kg).

#### S4 – Calculation of total emission factor

Table S1 shows a summary of the instruments used to calculate the total emission factor from this study. The total signal from the PTR-ToF-MS had isotope peaks removed as well as reagent ion peaks ( $m/z$  31 Th), water cluster peaks ( $m/z$  37 Th), ammonia ( $m/z$  = 18.034 Th), acetylene ( $m/z$  = 26.015 Th), hydrogen cyanide ( $m/z$  = 28.019 Th), ethene ( $m/z$  = 28.03 Th), propene ( $m/z$  = 43.054 Th), nitrous acid ( $m/z$  = 48.008 Th), butadienes ( $m/z$  = 55.053 Th), butenes, other hydrocarbons ( $m/z$  = 57.069 Th), DMS ( $m/z$  = 63.032 Th), isoprene ( $m/z$  = 69.069 Th), pentenes, methylbutenes ( $m/z$  = 71.084 Th), benzene ( $m/z$  = 79.053 Th), toluene ( $m/z$  = 93.069 Th), C<sub>2</sub> substituted monoaromatics ( $m/z$  = 107.084 Th) and C<sub>3</sub> substituted monoaromatics ( $m/z$  = 121.099 Th). The emission factors for removed species have been incorporated from the DC-GC-FID and the GCxGC-FID.

Table S1. Summary of instruments used for calculation of total emission factor.

| Species                                                  | Instrument              |
|----------------------------------------------------------|-------------------------|
| <b>Aromatics</b>                                         |                         |
| Benzene-C <sub>3</sub> substituted monoaromatics         | GCxGC-FID               |
| C <sub>4</sub> -C <sub>5</sub> substituted monoaromatics | PTR-ToF-MS              |
| <b>Phenolics</b>                                         |                         |
| All species                                              | PTR-ToF-MS              |
| <b>Oxygenated aromatics</b>                              |                         |
| All species                                              | PTR-ToF-MS              |
| <b>Oxygenated aliphatics</b>                             |                         |
| All species                                              | PTR-ToF-MS              |
| <b>NVOCs</b>                                             |                         |
| All species                                              | PTR-ToF-MS              |
| <b>Furanics</b>                                          |                         |
| All species                                              | PTR-ToF-MS              |
| <b>Monoterpenes</b>                                      |                         |
| All species                                              | PTR-ToF-MS <sup>a</sup> |
| <b>PAHs</b>                                              |                         |
| All species                                              | PTR-ToF-MS <sup>a</sup> |
| <b>Alkenes</b>                                           |                         |
| All DC-GC-FID alkenes to C <sub>5</sub>                  | DC-GC-FID               |
| Remaining alkenes <sup>b</sup>                           | PTR-ToF-MS              |
| <b>Alkanes <sup>c</sup></b>                              |                         |

|                                          |                  |
|------------------------------------------|------------------|
| C <sub>2</sub> -C <sub>6</sub> alkanes   | DC-GC-FID        |
| C <sub>7</sub> -C <sub>12</sub> alkanes  | GCxGC-FID        |
| C <sub>13</sub> -C <sub>20</sub> alkanes | SPE-GCxGC-ToF-MS |

58

59 <sup>a</sup> PTR-ToF-MS signal used as may include isomers not measured by GCxGC-FID.

60 <sup>b</sup> Only alkenes not measured by DC-GC-FID.

61 <sup>c</sup> No peaks for > C<sub>6</sub> alkanes in PTR-ToF-MS spectra.

62

## 63

64

65

66

67

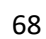

69

70
